# Supplementary material for: Adherence to the Chinese or American Dietary Guidelines is Associated with a Lower Risk of Primary Liver Cancer in China: A Case-Control Study
Source: Nutrients. 2018 Aug 17;10(8):1113. doi: 10.3390/nu10081113 (PMC6115710; doi:10.3390/nu10081113)
Supplement: Supplementary file 1 [file nutrients-10-01113-s001.pdf]

# Adherence to the Chinese or American Dietary Guidelines is Associated with a Lower Risk of Primary Liver Cancer in China: A Case-Control Study

Supplemental Table S1. Components of the scoring standards for each component of the CHEI and HEI-2015 by using standardized portion size <sup>1</sup>.

| Dietary indexes, scoring and criteria <sup>2</sup> |                                                                                                                                           |                                                                                                                                      |
|----------------------------------------------------|-------------------------------------------------------------------------------------------------------------------------------------------|--------------------------------------------------------------------------------------------------------------------------------------|
|                                                    | CHEI                                                                                                                                      | HEI-2015 <sup>3</sup>                                                                                                                |
| Total Score                                        | 100                                                                                                                                       | 100                                                                                                                                  |
| Component                                          | 17 components (5-10 points each)                                                                                                          | 13 components (5-10 each)                                                                                                            |
| Vegetables                                         | Total vegetables: $\geq 1.9$ SP (5 points); Dark Vegetables: $\geq 0.9$ SP (5 points); Tubers: $\geq 0.3$ SP (5 points)                   | Total vegetables: $\geq 1.1$ cup equivalents (5 points); greens and beans: $\geq 0.2$ cup equivalents (5 points)                     |
| Fruit                                              | Fruits: $\geq 1.1$ SP (10 points)                                                                                                         | Total fruits <sup>4</sup> : $\geq 0.8$ cup equivalents (5 points); whole fruits <sup>5</sup> : $\geq 0.4$ cup equivalents (5 points) |
| Nuts                                               | Seeds and Nuts: $\geq 0.4$ SP (5 points)                                                                                                  |                                                                                                                                      |
| Legumes                                            | Whole grains and mixed beans: $\geq 0.6$ SP (5 points)                                                                                    | Allocated to four components: Total protein foods, seafood and plant proteins, total vegetables and greens and beans.                |
| Whole grains                                       | -                                                                                                                                         | Whole grains: $\geq 1.5$ oz. equivalents (10 points)                                                                                 |
| Fish                                               | Fish and Seafood: $\geq 0.6$ SP (5 points)                                                                                                | Seafood and plant proteins <sup>6</sup> : $\geq 0.8$ oz. equivalents (5 points)                                                      |
| Total protein foods                                | Soybeans: $\geq 0.4$ SP (5 points); Poultry: $\geq 0.3$ SP (5 points); Eggs: $\geq 0.5$ SP (5 points); Red meat: $\geq 0.4$ SP (5 points) | Total proteins foods: $\geq 2.5$ oz. equivalents (5 points)                                                                          |
| Dairy                                              | $\geq 0.5$ SP (5 points)                                                                                                                  | $\geq 1.3$ cup equivalents (10 points)                                                                                               |
| Oils or fats                                       | Cooking oils: $\leq 15.6$ g (10 points)                                                                                                   | (PUFAs + MUFAs)/SFAs ratios $\geq 2.5$ (10 points) <sup>8</sup> ; saturated fats: $\leq 8\%$ of energy (10 points);                  |
| Alcohol                                            | Alcohol: 25-60 g/d (men); 15-40 g/day (women) (5 points)                                                                                  | contribute calories to the total energy                                                                                              |
| Refined grains                                     | Total grains <sup>7</sup> : $\geq 2.5$ SP (5 points)                                                                                      | $\leq 1.8$ oz. equivalents (10 points)                                                                                               |
| Sodium                                             | $\leq 1000$ mg (10 points)                                                                                                                | $\leq 1100$ mg (10 points)                                                                                                           |
| Added Sugars                                       | $\leq 10\%$ of energy (5 points)                                                                                                          | $\leq 6.5\%$ of energy (10 points)                                                                                                   |

CHEI, Chinese Eating Index; HEI-2015, Healthy Eating Index-2015. <sup>1</sup> Standardized portion sizes (SP) are based on the Dietary Guidelines for the Chinese, 2016. <sup>2</sup> All components are based on the density standard (per 1,000 kcal or percentage of energy), except for alcohol in the CHEI and fatty acid ratios in HEI-2015. <sup>3</sup> Components standardized in the HEI-2015 are based on the Food Patterns Equivalents Database (FPED), which was previously called the MyPyramid

Equivalents Database (MPED). <sup>4</sup> Total fruits included 100% fruit juice. <sup>5</sup> Whole fruits included all fruits except juice. <sup>6</sup> Seafood and plant proteins included seafood, nuts, seeds, soy products, and legumes. <sup>7</sup> Total grains included refined grains and whole grains. <sup>8</sup> A ratio of total unsaturated fatty acids (poly- and monounsaturated fatty acids [PUFAs and MUFAs]) to saturated fatty acids (SFAs).
